# Supplementary material for: Association of Differing Qatari Genotypes with Vitamin D Metabolites
Source: Hindawi journal article supplement (doi:10.1155/2020/7831590), 2020-04-13
Supplement: f1 [file 7831590.f1.pdf]

Supplementary Table 1. Vitamin D metabolites according to gender

|                                             | <b>Females</b>      | <b>Males</b>        | <b>Significance</b> |
|---------------------------------------------|---------------------|---------------------|---------------------|
|                                             | <b>Median (IQR)</b> | <b>Median (IQR)</b> |                     |
| <b>Total 1,25(OH)<sub>2</sub>D (ng/ml)</b>  | 0.01 (0.00-0.04)    | 0.04 (0.02-0.06)    | <0.001              |
| <b>Total 25(OH)D (ng/ml)</b>                | 24.12 (18.83-36.88) | 18.73 (13.12-29.58) | <0.001              |
| <b>Total 3epi-25(OH)D (ng/ml)</b>           | 0.14 (0.00-0.36)    | 0.28 (0-0.78)       | 0.26                |
| <b>Total 24,25(OH)<sub>2</sub>D (ng/ml)</b> | 0.24 (0.17-0.51)    | 0.39 (0.24-0.62)    | 0.006               |

1,25(OH)<sub>2</sub>D =1,25-dihydroxyvitamin D; 25(OH)D = 25-hydroxyvitamin D;  
 3epi25(OH)D = 25-hydroxy-3epi-Vitamin D (3epi25(OH)D); 24,25(OH)<sub>2</sub>D =24, 25-dihydroxyvitamin D
